# Supplementary material
Source: publisher site journal article supplement (https://www.dovepress.com/article/475323)
Supplement: Supplementary file 1 [file get_supplementary_file.php]

**Table S1.** **Human and mouseprimers to study the changes in gene expression related to the antioxidant response in A549 cells or in mice**

| **Gene (Protein)**  **NCBI Reference Sequence for the predicted mRNA** | **Forward (5’-3’)** | **Reverse (5’-3’)** |
| --- | --- | --- |
| ***CAT*** (Catalase) | AGAGAAATCCTCAGACACATC | CAGCTTGAAAGTATGTGATCC |
| ***SOD1*** (Superoxide Dismutase 1) | GAGCAGAAGGAAAGTAATGG | GATTAAAGTGAGGACCTGC |
| ***SOD2*** (Superoxide Dismutase 2) | ATCATACCCTAATGATCCCAG | AGGACCTTATAGGGTTTTCAG |
| ***Sod2**** (Superoxide Dismutase 2) | CCATTTTCTGGACAAACCTG | GACCTTGCTCCTTATTGAAG |
| ***SOD3*** (Superoxide Dismutase 3) | CCTCCATTTGTACCGAAAC | GAAGATCGTCAGGTCAAAG |
| ***DUOX1*** (Dual Oxidase 1) | GTTTGAGGTGTCAGTGTTAG | GATCTTCTTACAGAACACTTGG |
| ***DUOX2*** (Dual Oxidase 2) | AAGATCTACTTCATCTGGGTG | TGACATAAATGTGCACAGAC |
| ***Duox2**** (Dual Oxidase 2) | ATCTACATTACTCAGCTGGC | ATCTTACGTACCTGTGGATG |
| ***TXNRD2*** (Thioredoxin reductase 2) | ACTTTAACATCAAAGCCAGC | GTAGCAATGATGATGTGATCG |
| ***GAPDH*** (Glyceraldehyde 3-phosphate dehydrogenase) | TGCACCACCAACTGCTTAGC | GGCATGGACTGTGGTCATGAG |

** Mus musculus primers. The non-labelled primers are Homo sapiens primers*

**Table S2.** **Primers designed to study changes in gene expression in African Green monkey Vero E6 cells.***

| **Gene (Protein)**  **NCBI Reference Sequence for the predicted mRNA** | **Forward (5’-3’)** | **Reverse (5’-3’)** |
| --- | --- | --- |
| ***TFRC*** (Transferrin receptor protein1) - XM_008009680.2 | AAGATTCAGGTCAAAGACAG | CTTACTATACGCCACATAACC |
| ***SLC11A2*** (Divalent metal transporter 1-DMT1) - XM_037997121.1 | GAGTATGTTACAGTGAAACCC | GACTTGACTAAGGCAGAATG |
| ***SLC48A1*** (Heme transporter 1- HRG1) - XM_008003003.2 | ATGTACATGCAAGATTACTGGAG | GTCTGTGAGGCTCTGATG |
| ***SLC40A1*** (Ferroportin – FPN1) - XM_007965607.2 | AAAGATACTGAGCCAAAACC | GTTGTAGTAGGAGACCCATC |
| **IREB2** (Iron Responsive element-binding protein 2) - XM_038010228.1 | CATTTTCCGTCAGGACAGAC | CCAGTAAATATGGTCCTTTG |
| ***LCN2*** (Neutrophil gelatinase-associated lipocalin – NGAL) - XM_008006094.2 | GGAAAGAGAAGTGTGACTACTG | GTGATTCTGAATGTTGCCCAG |
| ***GAPDH*** (Glyceraldehyde 3-phosphate dehydrogenase) - XM_037988380.1 | TGCCATGGGTGGAATCATATTGGA | TCGGAGTCAACGGATTTGGGTCGT |

* African Green monkey (*Chlorocebus sabaeus*, NCBI taxid 60711). Adapted from DeDiego ML, Portilla Y, Daviu N, et al. Iron oxide and iron oxyhydroxide nanoparticles impair SARS‑CoV‑2 infection of cultured cells. *J Nanobiotechnol*. 2022;20:352 (<http://creativecommons.org/licenses/by/4.0/>).1

**Supporting Results**

**
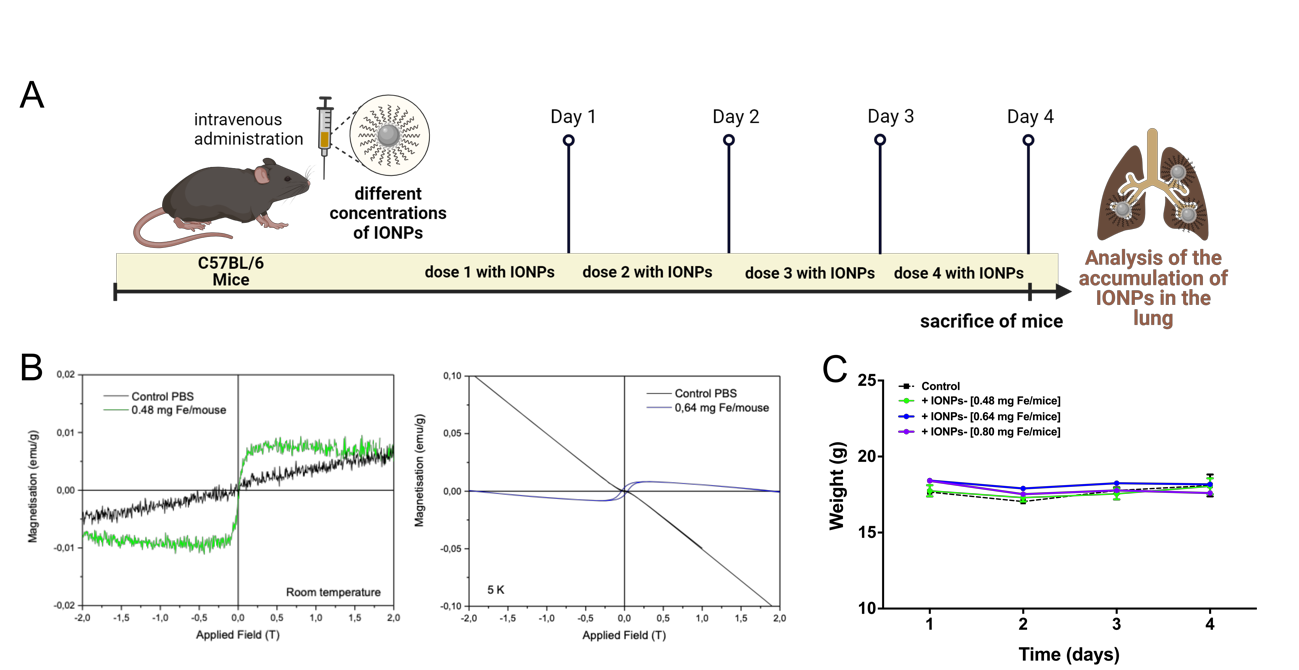
**

**Figure S1. DMSA-IONPs-10 are not toxic at different doses and they accumulate in the lungs after retro-orbital injection *in vivo*. (**A) Experimental timeline of the *in vivo* experiment. (B) DMSA-IONPs-10 in the lung were assessed by SQUID magnetometer, showing superparamagnetic behavior at a dose of 0.48 mg Fe/mouse at room temperature and ferromagnetic behavior at a dose of 0.64 mg Fe/mouse at 5 K, while paramagnetic behavior was detected at both temperatures after PBS administration. (C) No significant changes in body weight were evident over a 4-day period at the doses tested.


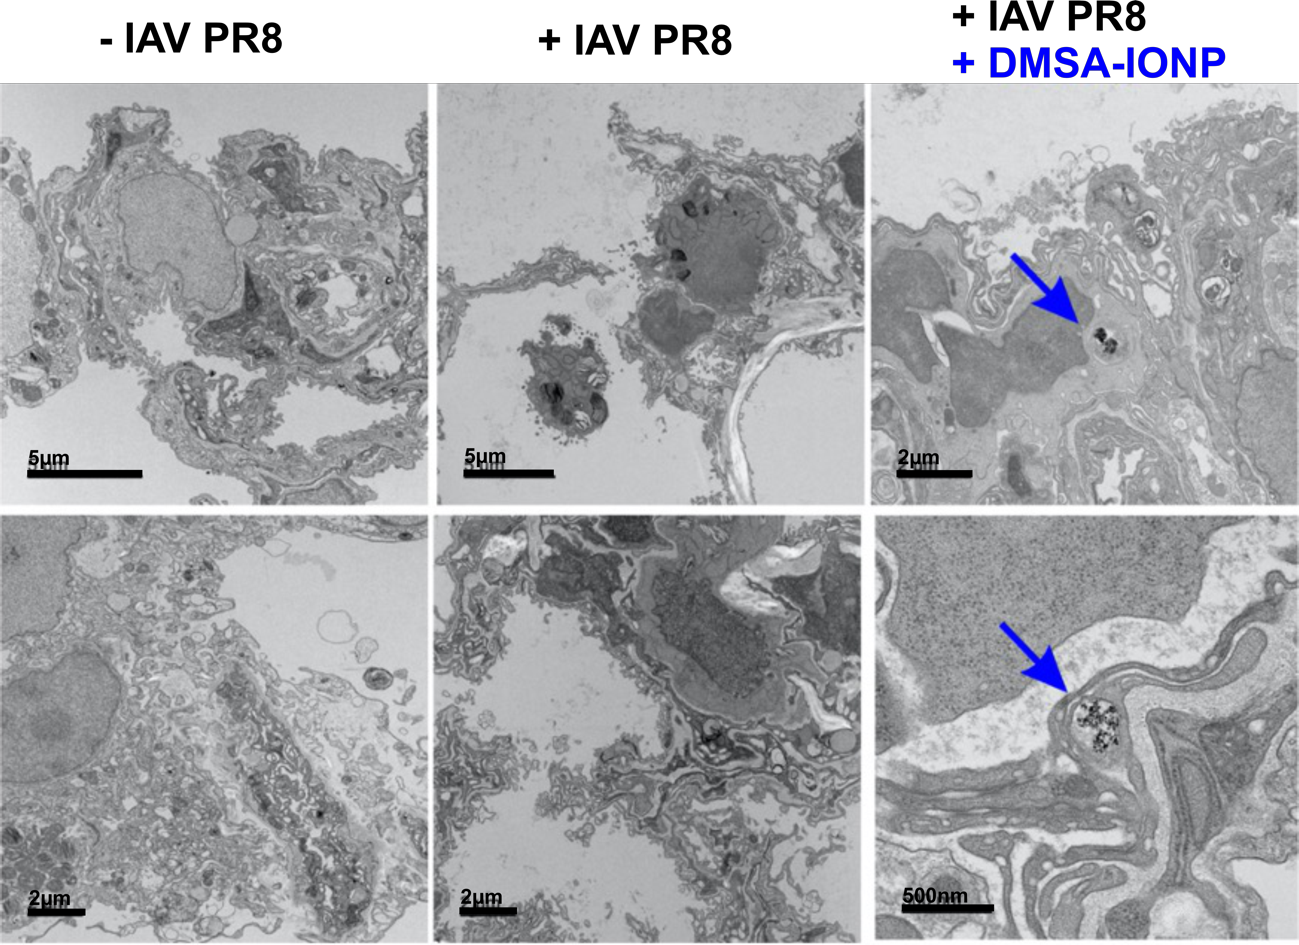


**Figure S2. Ultrastructural analysis of the lungs of uninfected and IAV infected mice, with and without DMSA-IONP-10 treatment.** Normal conditions: un-treated mice (- IAV PR8). Mice infected with IAV PR8 but with no posterior treatment (+ IAV PR8). Mice infected with IAV PR8 and administered 4 doses of DMSA-IONPs-10 (+IAV PR8 + DMSA-IONP). Blue arrow indicates the presence of DMSA-IONPs-10 in lung tissue. Scale bars: 5 μm, 2 μm or 500 nm.


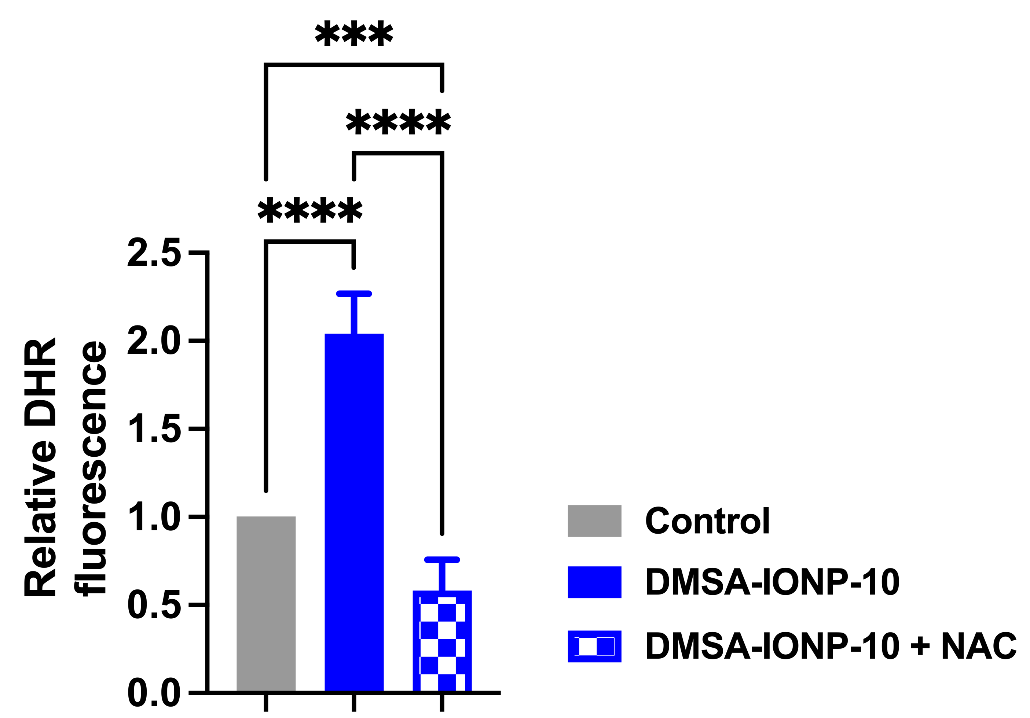


**Figure S3. N-Acetyl-L-Cysteine (NAC) reduces ROS production by DMSA-IONPs-10.** ROS production after DMSA-IONP-10 treatment with or without the antioxidant NAC was studied by quantifying DHR fluorescence of at least 200 cells per condition. The data was analyzed by one-way ANOVA with a Tukey multiple comparison test to assess the differences between the groups: ***p < 0.001, ****p < 0.0001.


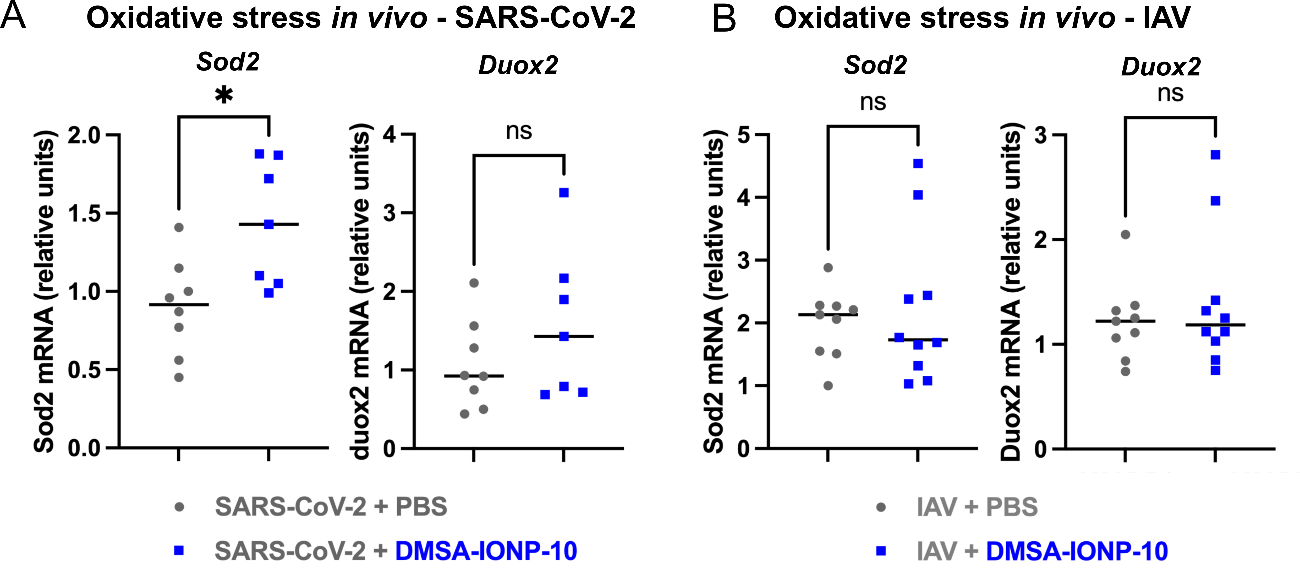


**Figure S4. Effect of DMSA-IONP-10 on the induction of oxidative stress *in vivo*.** Quantification of Sod2 and Duox2 gene expression by RT-qPCR (mRNA levels) using total RNA extracted from lungs from SARS-CoV-2 (A) or IAV-infected mice (B), treated with DMSA-IONP-10 or with PBS, at 4 dpi. The expression following oxidative stress was compared to that in mock-infected, non-treated, control mice and the data were normalized to the expression of *GAPDH*. The differences on antioxidant gene expression were analyzed with a t-test *p < 0.05, and ns, no significant differences.

**Reference**

1 DeDiego, M.L, Portilla, Y, Daviu, N, et al. Iron oxide and iron oxyhydroxide nanoparticles impair SARS‑CoV‑2 infection of cultured cells. *Journal of Nanobiotechnology*. doi:10.1186/s12951-022-01542-2
